# Supplementary material for: Oxygen-vacancy-containing Nb2O5 nanorods with modified semiconductor character for boosting selective nitrate-to-ammonia electroreduction
Source: Royal Society of Chemistry journal article supplement (doi:10.1039/d1se01855h), 2022-01-01
Supplement: d1se01855h1.pdf [file d1se01855h1.pdf]

*Electronic supplementary information*

**Oxygen-vacancy-containing Nb<sub>2</sub>O<sub>5</sub> nanorods with modified semiconductor character for boosting selective nitrates-to-ammonia electroreduction**

**Bo Cao,<sup>a,b</sup> Xun Xu,<sup>a,b\*</sup> Zhuozheng Hong,<sup>a,b</sup> Junzhi Liao,<sup>a,b</sup> Ping Li,<sup>a,b</sup> Hao Zhang,<sup>a,b</sup> and Shuwang Duo,<sup>a,b\*</sup>**

<sup>a</sup> *School of Materials and Mechanical & Electrical Engineering, Jiangxi Science and Technology Normal University, Nanchang 330013, China*

<sup>b</sup> *Jiangxi Key Laboratory of Surface Engineering, Jiangxi Science and Technology Normal University, Nanchang, 330013, China Email: rozen121@163.com, swduo@126.com*

## **1. Experimental details**

### **1.1 Chemicals**

All chemicals were analytical grade and used as received without further purification. The chemicals were purchased from Aladdin Chemical reagent Co., Ltd. (Shanghai, China). Deionized (DI) water was used in all experiments

### **1.2 Instrumentation**

The morphologies of the samples were characterized by scanning electronic microscopy (SEM) using a microscope (FEI, Tecnai G220 S-TWIN,US) and transmission electron microscope (TEM) using a microscope (JEOL Ltd. JEM-2100f, Japan). X-ray diffraction (XRD) of all the prepared materials were performed on diffraction instrument (Sinmadzu, XRD-6100, Japan). Spectrophotometry vis UV/Vis spectrophotometer (UV-1800 S). X-ray photoelectron spectroscopy (XPS, Thermo Scientific, K-Alpha ,US) was used to analyze the chemical state of the oxide. Ion chromatograph was used to detect and analyze ions in solution (Aquion ICS-1100).

### **1.3 Ion concentration detection methods**

The ion concentration of the electrolyte diluted to a suitable concentration was measured with a UV-Vis spectrophotometer and Ion chromatography to match the range of the calibration curve. Specific detection methods are as follows :

#### **1.3.1 UV-Vis spectrophotometer**

**Detection of nitrate-N:** Firstly, 2.0 mL electrolyte was taken out from the electrolytic cell and diluted to 5 mL to detection range. Then, 0.1 mL 1 M HCl and 0.01 mL 0.8 wt% sulfamic acid solution were added into the aforementioned solution. After 15 minutes, the absorbance was detected by UV-Vis spectrophotometry at a wavelength of 220 nm and 275 nm. The final absorbance of nitrate-N was calculated based on the following equation:  $A = A_{220\text{nm}} - 2A_{275\text{nm}}$ . The correction curve can be obtained by  $\text{NaNO}_3$  solution of different concentrations and corresponding absorbance.

**Detection of ammonium-N:** With 4.1667 g of sodium hydroxide, 5 g of salicylic acid and 5 g of sodium citrate, 100mL solution A was prepared .9.0 mL sodium hypochlorite solution was prepared into 100 mL solution B. 1 g sodium ammonium ferricyanide ( $\text{C}_5\text{FeN}_6\text{Na}_2\text{O}$ ) in 100 mL solution C. 2ml of electrolyte was taken out

of the electrolytic cell, and then 1ml of liquid A, 1ml of liquid B and 0.5ml of liquid C were respectively taken to prepare A 5ml mixed solution After shaking and standing for 1 h , the absorbance was tested by UV-Vis spectrophotometry at a wavelength of 655 nm. The calibration curve can be obtained through different concentrations of  $\text{NH}_4\text{Cl}$  solutions and the corresponding absorbance.

### **1.3.2 Ion chromatography**

**Detection of ammonium-N and nitrate-N:** After pretreatment, the samples were determined according to the set chromatographic conditions, using external standard method Quantification, the response value of ammonium ion in the sample solution to be measured should be within the linear range of the standard curve Chromatographic peak retention time should be consistent with the standard substance

### **1.4 Electrochemical measurements**

Electrochemical measurements were performed using an electrochemical workstation (Princeton, VersaSTAT 4, US) by employing an air-proof two-compartment cell separated by a Nafion membrane. The working, counter, and reference electrodes were sample foil, silver chloride electrode, and platinum foil, respectively. The working electrode was cut into a small square with a surface area of  $1\text{ cm} \times 1\text{ cm}$ . A 0.5 M  $\text{Na}_2\text{SO}_4$  aqueous solution with  $\text{NaNO}_3$  (50 ppm nitrate-N) was used as both the catholyte (35 mL) and anolyte (35 mL). Ar (99.995 vol%) gas was continuously fed into the solution throughout the tests (see Supporting Information for details). All the potentials were recorded on an RHE and all the polarisation curves were stable after continuous circulation.

### **1.5 Calculation of the yield, selectivity, and Faradaic efficiency.**

Potentiostatic tests were conducted to measure the yield, selectivity, and Faradaic efficiency of  $\text{NH}_3$  and the conversion of  $\text{NO}_3^-$  The potentiostatic test (0.5 M  $\text{Na}_2\text{SO}_4$  aqueous solution with  $\text{NaNO}_3$  50 ppm nitrate-N) was carried out at different potentials for 2 h with a stirring rate of 300 rpm. The concentration of  $\text{NH}_3$  and  $\text{NO}_3^-$  in

electrolyte was detected at intervals (0, 1, 2 h).

The conversion of  $\text{NO}_3^-$  was calculated using the Eq. S1:

$$\text{NO}_3^- \text{ conversion} = \Delta C_{\text{NO}_3^-} / C_0 \times 100\% \quad (\text{Eq. S1})$$

The selectivity of the product calculated using the Eq. S2:

$$\text{NH}_3 \text{ selectivity } (S_{\text{NH}_3}) = C_{\text{NH}_3} / \Delta C_{\text{NO}_3^-} \times 100\% \quad (\text{Eq. S2})$$

The yield of  $\text{NH}_3$  (aq) was calculated using the Eq. S3:

$$\text{Yield NH}_3 = (C_{\text{NH}_3} \times V) / (M_{\text{NH}_3} \times t \times m) \quad (\text{Eq. S3})$$

The Faradaic efficiency was calculated using the Eq. S4:

$$\text{Faradaic efficiency} = (8F \times C_{\text{NO}_3^-} \times V) / (M_{\text{NO}_3^-} \times Q) \times 100\% \quad (\text{Eq. S4})$$

where  $C_0$  is the initial concentration of  $\text{NO}_3^-$ ,  $\Delta C_{\text{NO}_3^-}$  is the concentration difference of  $\text{NO}_3^-$  before and after electrolysis,  $C_{\text{NH}_3}$  is the concentration of  $\text{NH}_3$  (aq,  $t$  (s) is the electrolysis time,  $F$  is the Faradaic constant ( $96485 \text{ C mol}^{-1}$ ),  $V$  is the electrolyte volume,  $m$  is the mass of catalyst,  $Q$  is the total charge passing the electrode.

## 2. Additional Figures and Tables

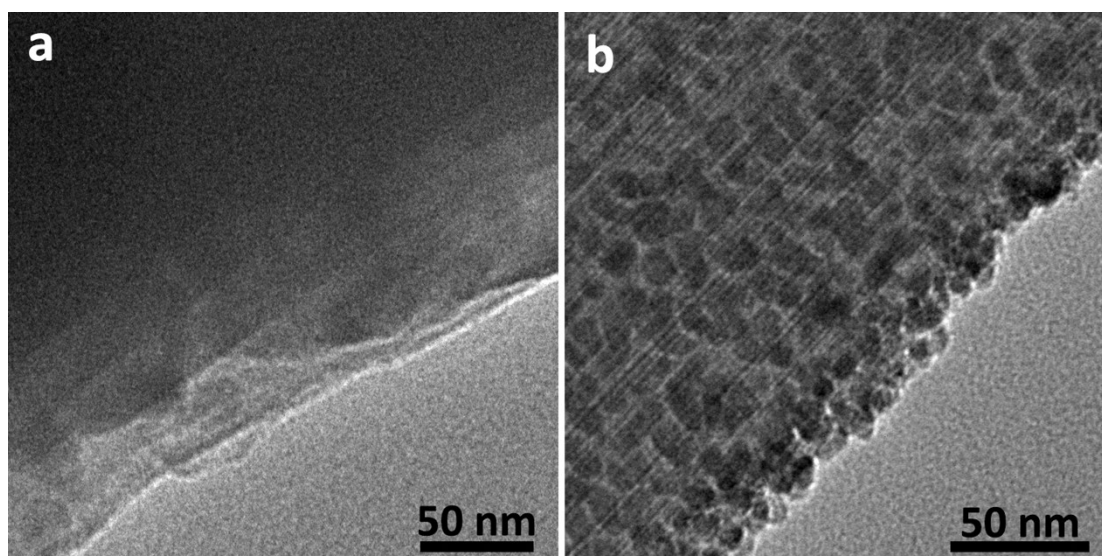

**Fig. S1** TEM images of  $\text{Nb}_2\text{O}_5$  (a) and  $\text{Nb}_2\text{O}_{5-x}$  (b)

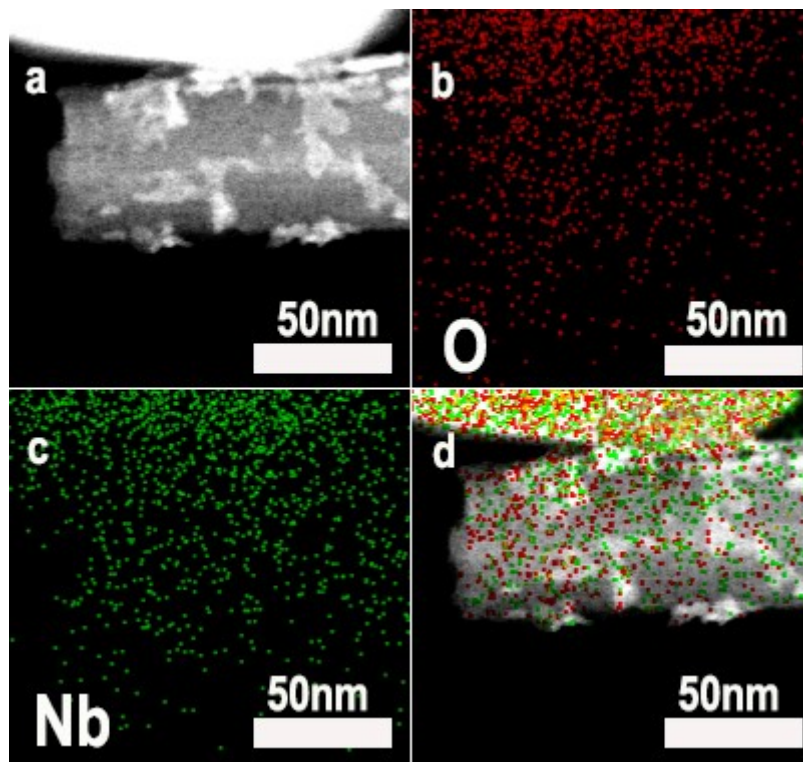

**Fig. S2** (a) HAADF-STEM image of Nb<sub>2</sub>O<sub>5-x</sub> together with EDX mapping images of (b) O, (c) Nb, and (d) the total elements distribution

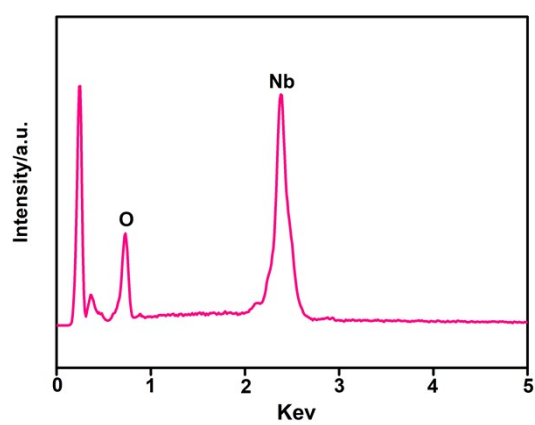

**Fig. S3** EDX spectra of Nb<sub>2</sub>O<sub>5-x</sub>

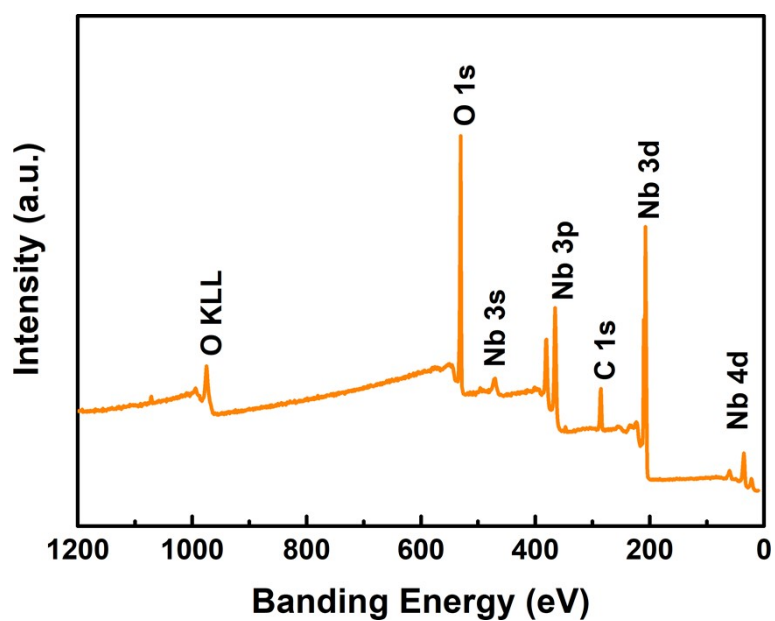

**Fig. S4** The Full XPS spectra of  $\text{Nb}_2\text{O}_{5-x}$

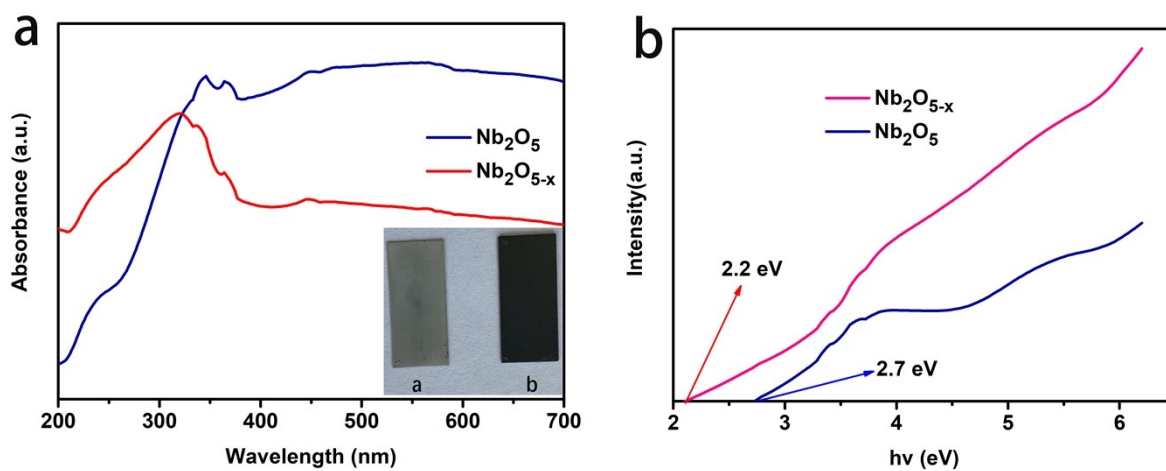

**Fig. S5** The Ultraviolet-visible diffuse reflectance spectra (UV-vis DRS)

of  $\text{Nb}_2\text{O}_{5-x}$  and  $\text{Nb}_2\text{O}_5$ (a), (b) the Band gap of  $\text{Nb}_2\text{O}_{5-x}$  and  $\text{Nb}_2\text{O}_5$

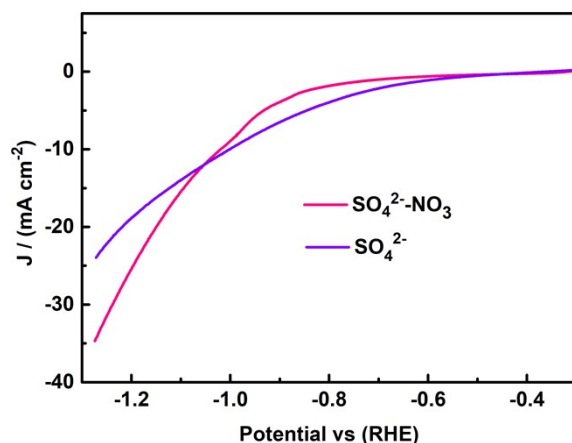

**Fig. S6** Linear scan voltammetry curves of Nb<sub>2</sub>O<sub>5-x</sub> with different electrolyte. The larger current in nitrate electrolyte suggests the reaction of nitrate electroreduction.

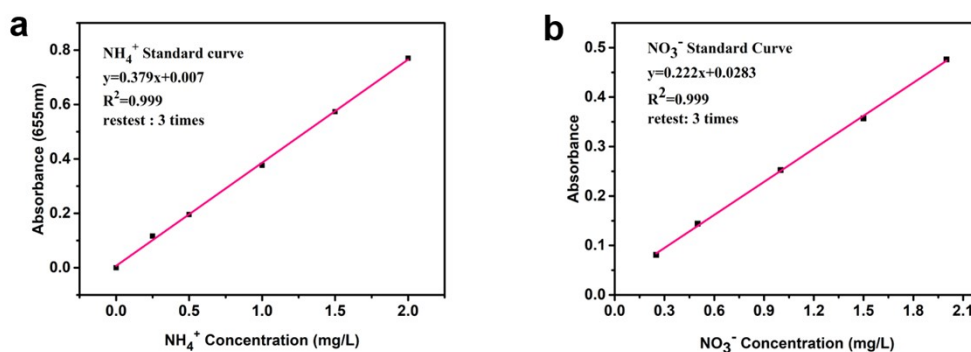

**Fig. S7** The UV-Vis absorption spectra and the corresponding calibration curves: (a) NH<sub>4</sub><sup>+</sup>-N, (b) NO<sub>3</sub><sup>-</sup>-N, The concentration of nitrate, and ammonia were all referred as nitrogen (NO<sub>3</sub><sup>-</sup>-N, NH<sub>4</sub><sup>+</sup>-N), and the ultrapure water was used as background solution.

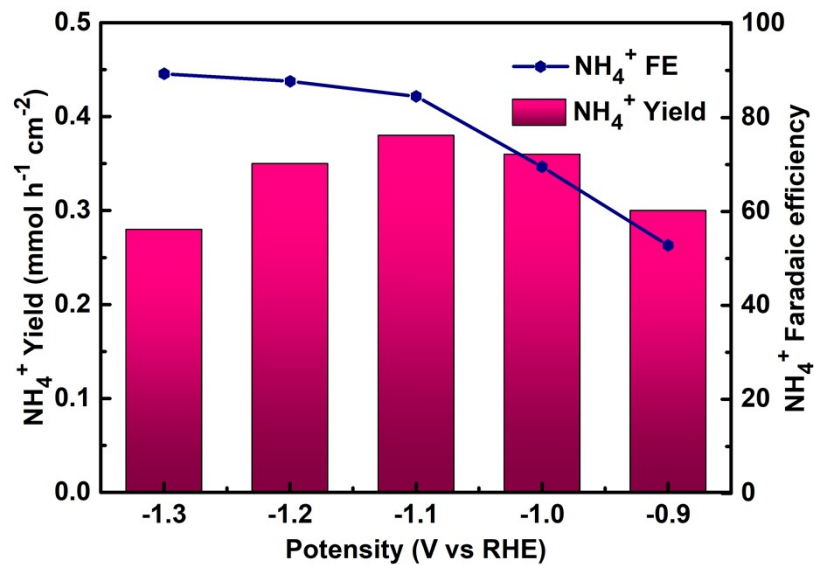

**Fig. S8** The faradaic efficiency and yield of ammonium over Nb<sub>2</sub>O<sub>5-x</sub> at different potentials.

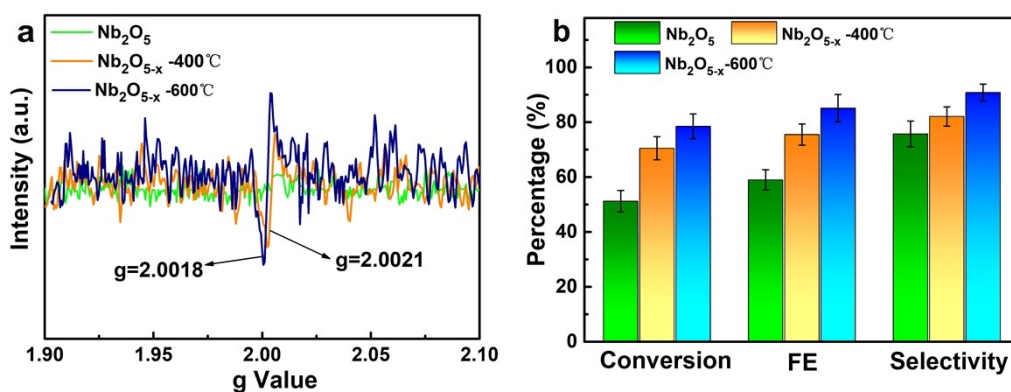

**Fig. S9** (a) EPR spectra , (b)ENRA test data of Nb<sub>2</sub>O<sub>5</sub> with different thermal condition



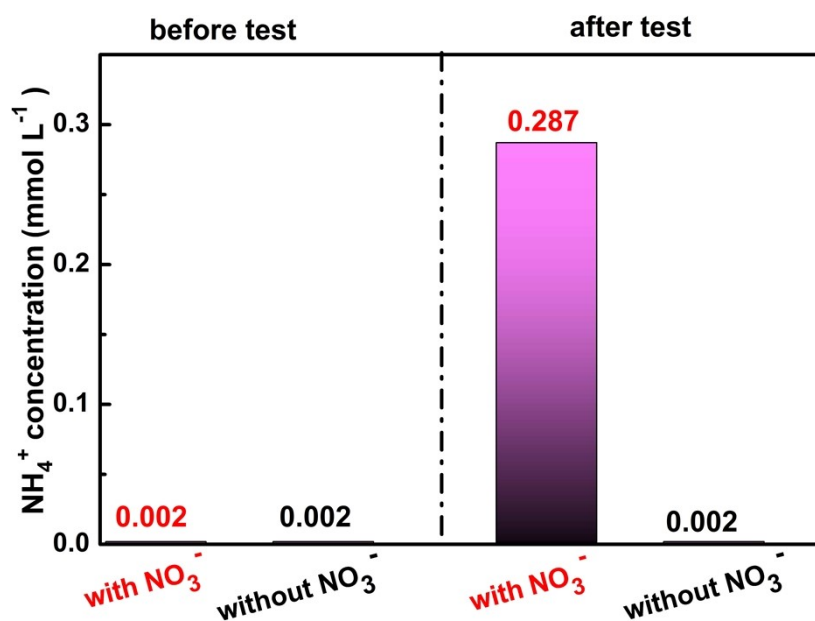

**Fig. S10** The ammonia concentration of solution (before and after potentiostatic tests) over Nb<sub>2</sub>O<sub>5-x</sub> in 0.5 M Na<sub>2</sub>SO<sub>4</sub> electrolyte with and without NO<sub>3</sub><sup>-</sup>.

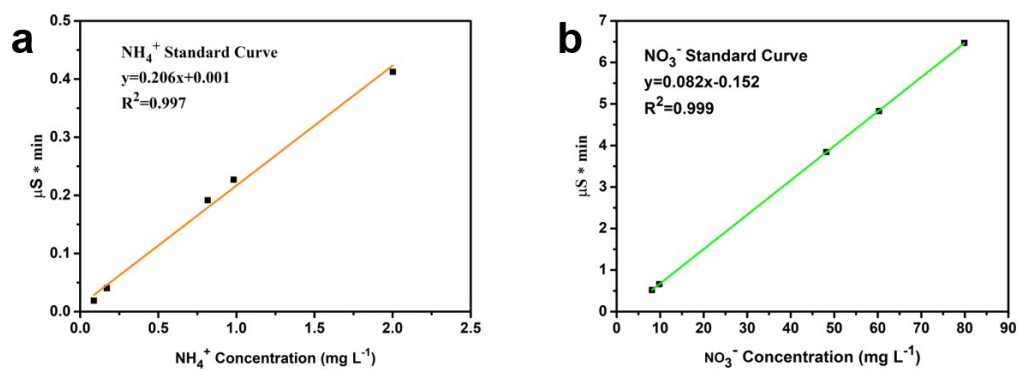

**Fig. S11** The ion chromatography absorption spectra and the corresponding calibration curves: (a) NH<sub>4</sub><sup>+</sup>-N, (b) NO<sub>3</sub><sup>-</sup>-N.

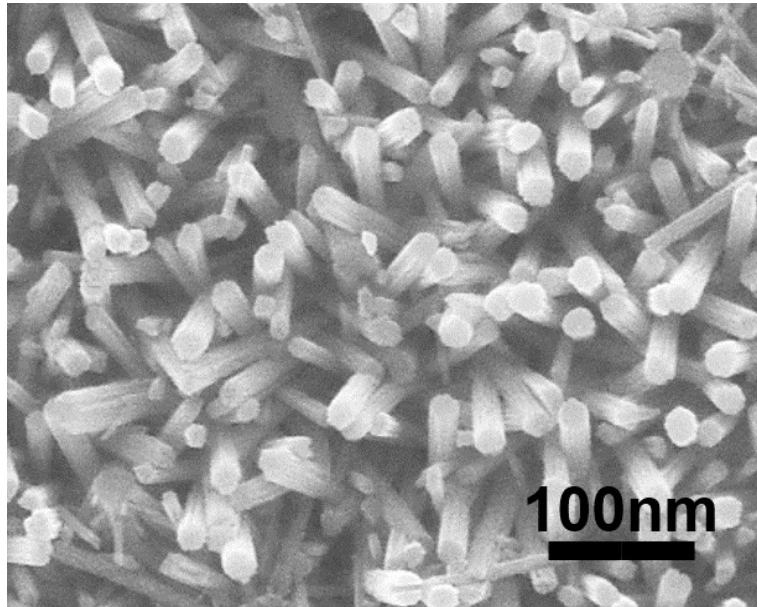

Fig. S12 SEM images of  $\text{Nb}_2\text{O}_{5-x}$  after cycling tests

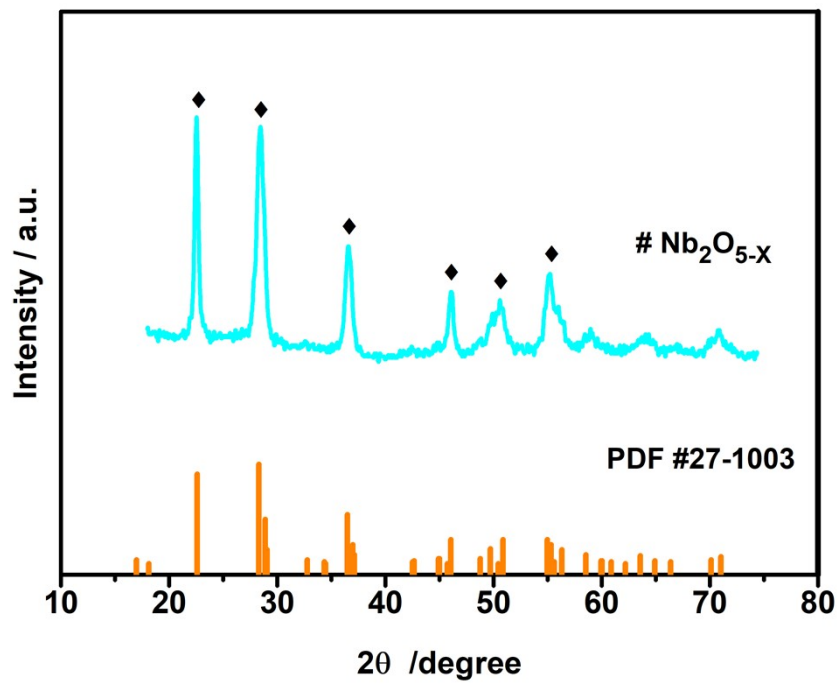

Fig. S13 XRD pattern of  $\text{Nb}_2\text{O}_{5-x}$  after cycling tests

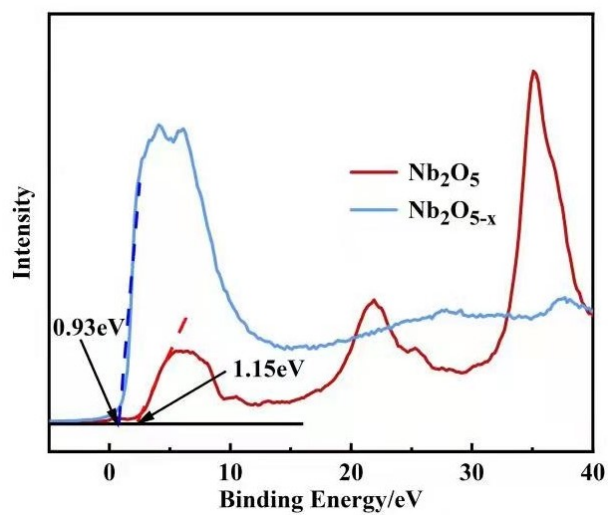

**Fig. S14** VB-XPS spectra of Nb<sub>2</sub>O<sub>5-x</sub> and Nb<sub>2</sub>O<sub>5</sub>

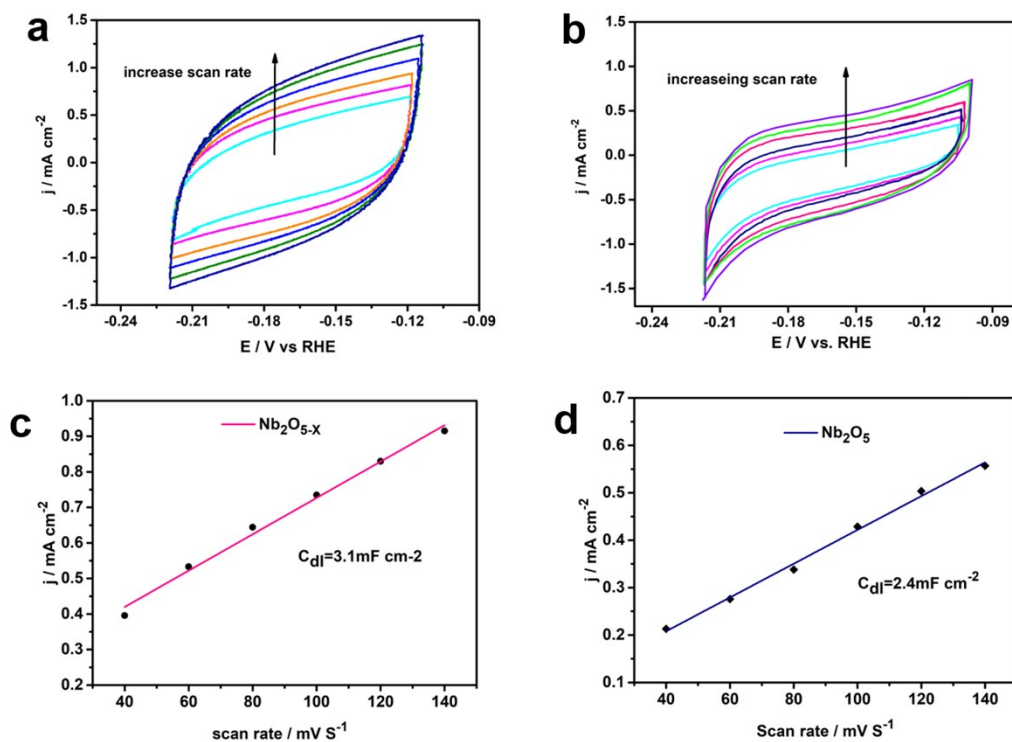

**Fig. S15** Cyclic voltammogram curves of  $\text{Nb}_2\text{O}_{5-x}$  (a) and  $\text{Nb}_2\text{O}_5$  (b) with various scan rates from 60 to 160  $\text{mV s}^{-1}$ . The difference in current plotted against scan rate showing the extraction of the double-layer capacitances (c) and (d), which allow the estimation of the electrochemically active surface area (ECSA).

**Table S1. Comparison of ammonia selectivity by electrocatalytic nitrate reduction**

| Electrocatalyst                                            | Electrolyte                                                                                                                        | Performance                                                                                                                                 | Detecting method                                        | Ref              |
|------------------------------------------------------------|------------------------------------------------------------------------------------------------------------------------------------|---------------------------------------------------------------------------------------------------------------------------------------------|---------------------------------------------------------|------------------|
| <b>Nb<sub>2</sub>O<sub>5-x</sub></b><br><b>(This work)</b> | <b>0.5 M Na<sub>2</sub>SO<sub>4</sub></b><br><b>50 ppmNO<sub>3</sub><sup>-</sup>-N</b>                                             | <b>FE (NH<sub>3</sub>): 85.1%</b><br><b>S (NH<sub>3</sub>): 90.8%</b><br><b>Y(NH<sub>3</sub>) : 287 μmol h<sup>-1</sup>cm<sup>-2</sup></b>  | <b>UV-Vis spectroscopy</b><br><b>Ion chromatography</b> | <b>This work</b> |
| Ni-FeO@Fe <sub>3</sub> O <sub>4</sub>                      | 50 ppm NO <sub>3</sub> <sup>-</sup> -N +<br>10 mM NaCl                                                                             | S (NH <sub>3</sub> ):10.4%                                                                                                                  | UV visible<br>spectrophotometer                         | 1                |
| TiO <sub>2-x</sub> nanotubes                               | 50 mM Na <sub>2</sub> SO <sub>4</sub> +<br>50 ppm NO <sub>3</sub> <sup>-</sup> -N                                                  | S (NH <sub>3</sub> ): 87.1%<br>FE (NH <sub>3</sub> ):85%<br>Y(NH <sub>3</sub> ) : 45 μmol h <sup>-1</sup> cm <sup>-2</sup>                  | UV-Vis spectroscopy<br>1H NMR                           | 2                |
| Co <sub>3</sub> O <sub>4</sub> -TiO <sub>2</sub> -PVP      | IrO <sub>2</sub> -RuO <sub>2</sub> /Ti   0.1<br>M Na <sub>2</sub> SO <sub>4</sub> , NaNO <sub>3</sub><br>(10 mA cm <sup>-2</sup> ) | S (NH <sub>3</sub> ): 73%-                                                                                                                  | UV-vis spectroscopy                                     | 3                |
| Co <sub>3</sub> O <sub>4</sub> /NiO HNTs                   | 0.5 M Na <sub>2</sub> SO <sub>4</sub><br>200 ppmNO <sub>3</sub> <sup>-</sup> -N                                                    | FE (NH <sub>3</sub> ): 55%<br>S (NH <sub>3</sub> ): 62.3%<br>Y(NH <sub>3</sub> ) : 6.9 μmol h <sup>-1</sup> mg <sub>cat</sub> <sup>-1</sup> | UV-vis spectroscopy                                     | 4                |
| PTCDA/O-Cu                                                 | 0.1 M PBS<br>+ 500 ppm NO <sub>3</sub> <sup>-</sup> -N                                                                             | FE (NH <sub>3</sub> ): 77±3%<br>Y(NH <sub>3</sub> ) : 436±85 μg h <sup>-1</sup> cm <sup>-2</sup>                                            | UV-vis spectroscopy                                     | 5                |
| Ti/TiHx                                                    | 0.1 M HNO <sub>3</sub> + 0.3<br>M KNO <sub>3</sub>                                                                                 | FE (NH <sub>3</sub> ): 82%                                                                                                                  | UV-vis<br>spectroscopy                                  | 6                |
| Bi <sub>2</sub> O <sub>3</sub> -CC                         | 50 M K <sub>2</sub> SO <sub>4</sub> + 750<br>ppm NO <sub>3</sub> <sup>-</sup> -N                                                   | FE (NH <sub>3</sub> ): 84.9%<br>S (NH <sub>3</sub> ): 80.3%                                                                                 | UV-vis<br>spectroscopy                                  | 7                |
| CuO nanoplates                                             | 50 ppm NO <sub>3</sub> <sup>3-</sup> + 0.0<br>M Na <sub>2</sub> SO <sub>4</sub>                                                    | S (NH <sub>3</sub> ): 81.99%<br>Y(NH <sub>3</sub> ) : 781.25 μg h <sup>-1</sup> cm <sup>-2</sup>                                            | UV-vis<br>spectroscopy                                  | 8                |
| 3D Cu-Pt<br>bimetallic                                     | 50 ppm NO <sub>3</sub> <sup>3-</sup> +<br>0.5 M Na <sub>2</sub> SO <sub>4</sub> ,                                                  | S (NH <sub>3</sub> ): 84%                                                                                                                   | UV-vis<br>spectroscopy                                  | 9                |
| Pd (110) facts                                             | 0.1 M NaOH + 400<br>ppm<br>NO <sub>3</sub> <sup>-</sup> -N                                                                         | FE (NH <sub>3</sub> ): 35%<br>Y (NH <sub>3</sub> ): 306.8 μg h <sup>-1</sup> mg <sub>Pd</sub> <sup>-1</sup>                                 | UV-vis<br>spectroscopy                                  | 10               |
| Fe single atom                                             | 0.50 M<br>KNO <sub>3</sub> /0.10 M<br>K <sub>2</sub> SO <sub>4</sub> mixed<br>electrolyte                                          | S (NH <sub>3</sub> ): 75%<br>FE (NH <sub>3</sub> ): 76%<br>Y(NH <sub>3</sub> ) : 460 μmol h <sup>-1</sup> mg <sub>cat</sub> <sup>-1</sup>   | 1H NMR                                                  | 11               |

Note:

Y (NH<sub>3</sub>): The yield of ammonia;

FE (NH<sub>3</sub>): The Faradaic efficiency of ammonia;

S(NH<sub>3</sub>): The selectivity of ammonia;

## Reference

1. Z. A. Jonoush, A. Rezaee and A. Ghaffarinejad, *J. Cleaner Prod.*, 2020, **242**, 118569.
2. R. Jia, Y. Wang, C. Wang, Y. Ling, Y. Yu and B. Zhang, *ACS Catal.*, 2020, **10**, 3533-3540.
3. J. Gao, B. Jiang, C. Ni, Y. Qi, Y. Zhang, N. Oturan and M. A. Oturan, *"Appl. Catal., B"*, 2019, **254**, 391-402.
4. Y. Wang, C. Liu, B. Zhang and Y. Yu, *Sci. China Mater.*, 2020, **63**, 2530-2538.
5. G.-F. Chen, Y. Yuan, H. Jiang, S.-Y. Ren, L.-X. Ding, L. Ma, T. Wu, J. Lu and H. Wang, *Nat. Energy*, 2020, **5**, 605-613.
6. J. M. McEnaney, S. J. Blair, A. C. Nielander, J. A. Schwalbe, D. M. Koshy, M. Cargnello and T. F. Jaramillo, *ACS Sustainable Chem. Eng.*, 2020, **8**, 2672-2681.
7. M. Chen, J. Bi, X. Huang, T. Wang, Z. Wang and H. Hao, *Chemosphere*, 2021, **278**, 130386.
8. Y. Xu, M. Wang, K. Ren, T. Ren, M. Liu, Z. Wang, X. Li, L. Wang and H. Wang, *J. Mater. Chem. A*, 2021, **9**, 16411-16417.
9. G. A. Cerrón-Calle, A. S. Fajardo, C. M. Sánchez-Sánchez and S. Garcia-Segura, *"Appl. Catal., B"*, 2021, 120844.
10. J. Lim, C.-Y. Liu, J. Park, Y.-H. Liu, T. P. Senftle, S. W. Lee and M. C. Hatzell, *ACS Catal.*, 2021, **11**, 7568-7577.
11. Z.-Y. Wu, M. Karamad, X. Yong, Q. Huang, D. A. Cullen, P. Zhu, C. Xia, Q. Xiao, M. Shakouri and F.-Y. Chen, *Nat. Commun.*, 2021, **12**, 1-10.
